# Supplementary material
Source: PubMed Central journal article supplement (PMC3310491)

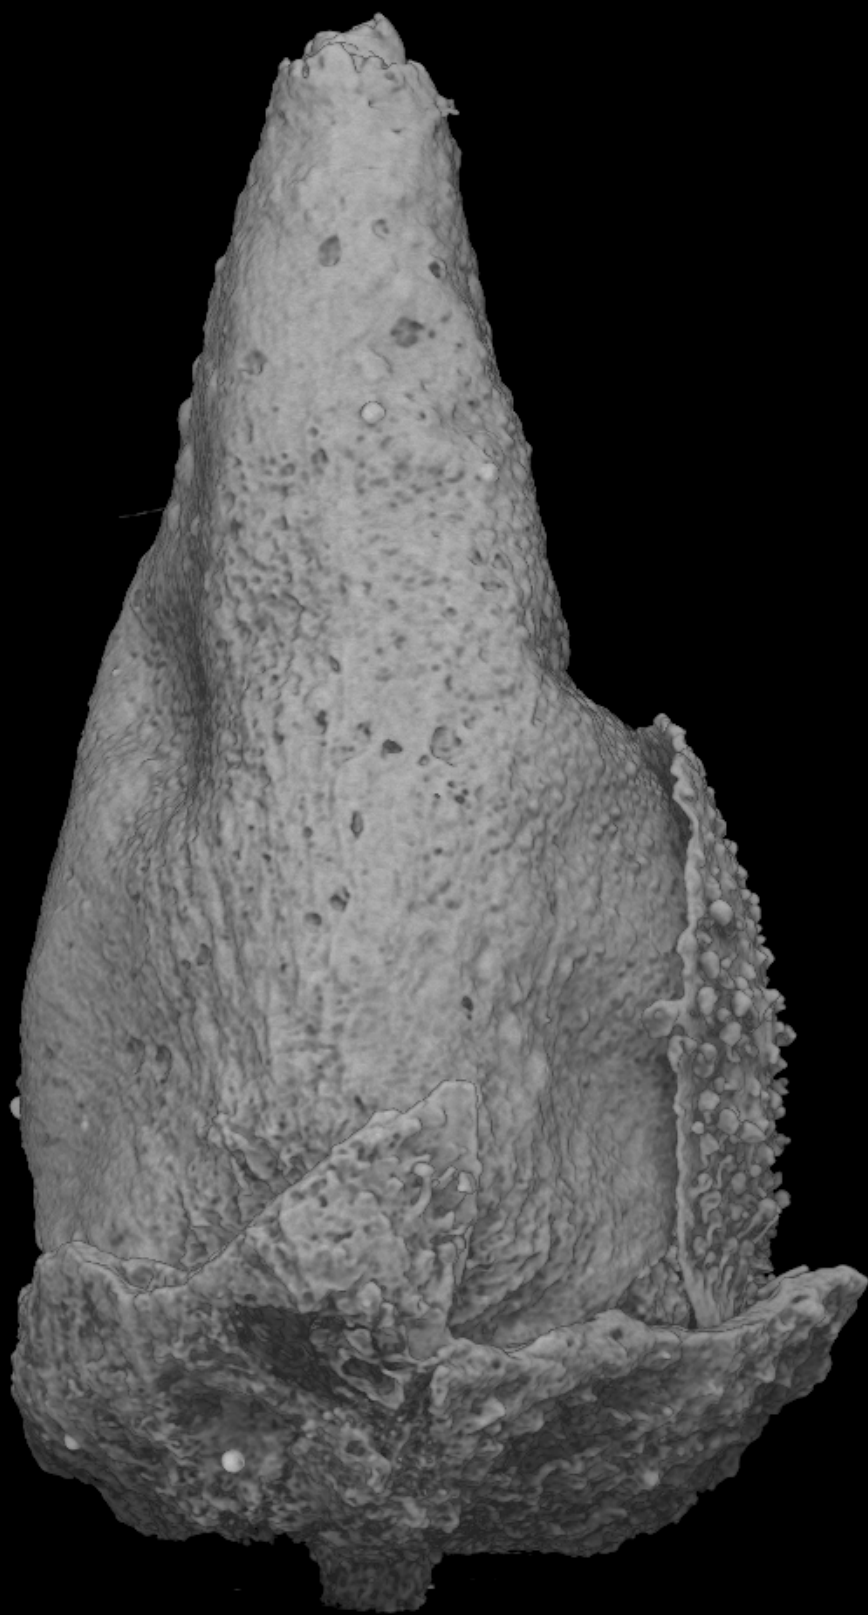

700um

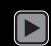

Supplement: supp_mcs009_mcs009supp_video1.pdf [file supp_mcs009_mcs009supp_video1.pdf]

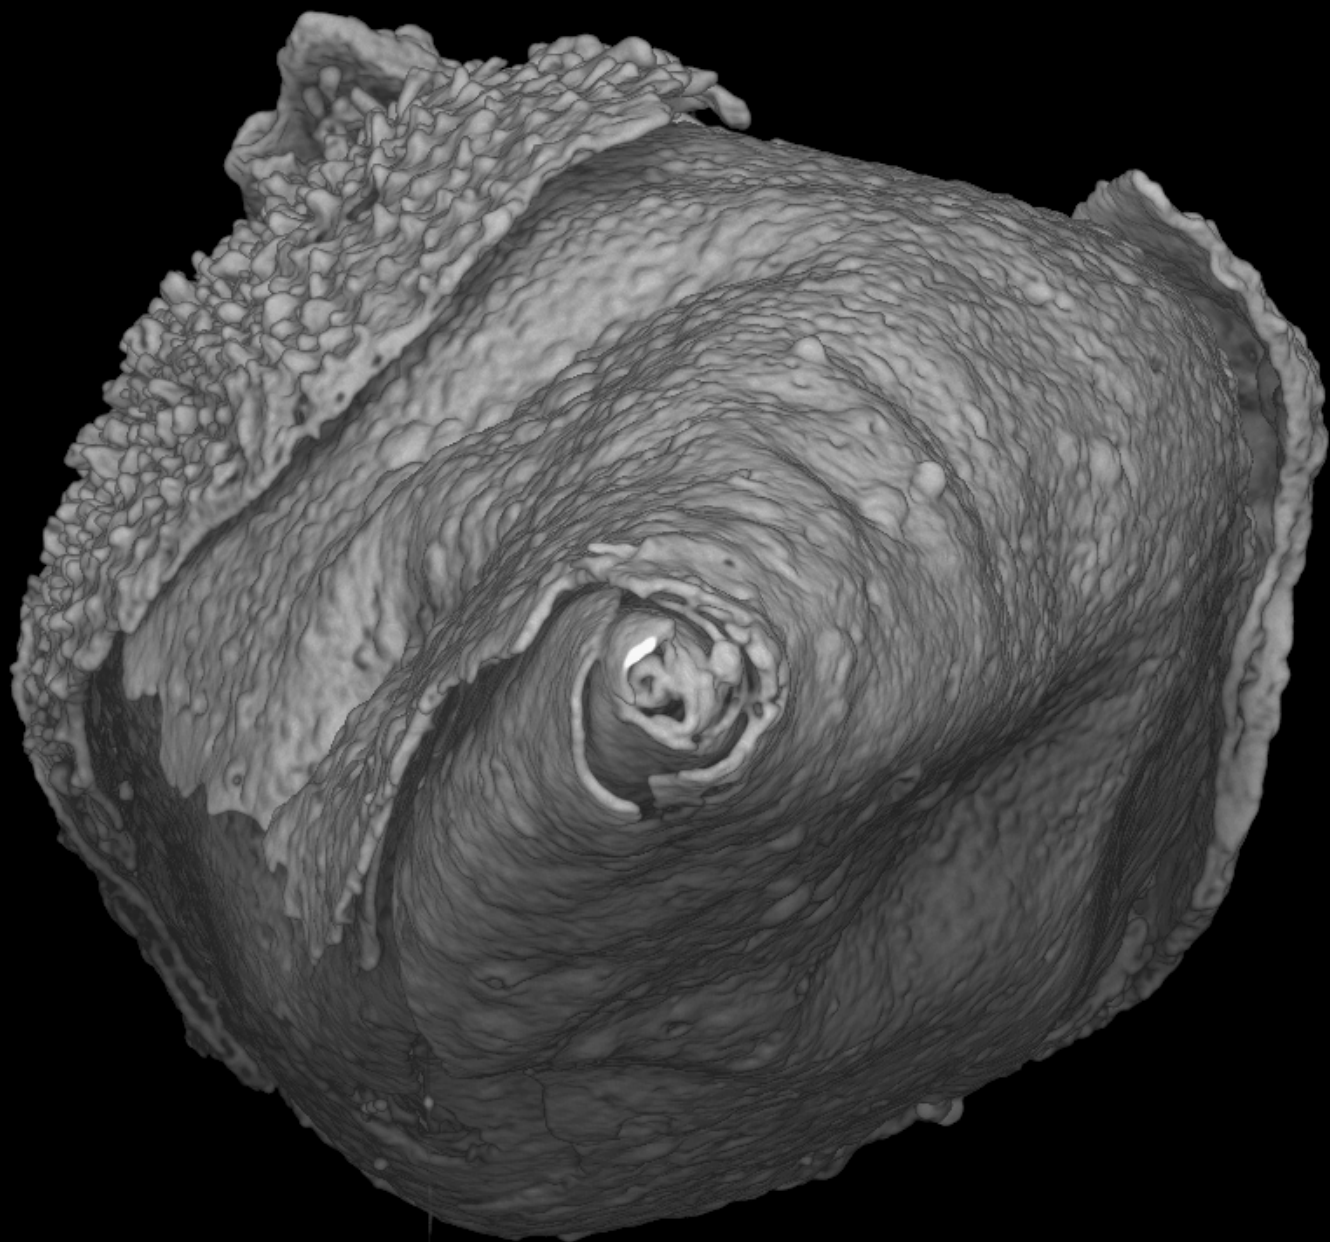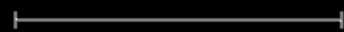

500um

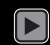

Supplement: supp_mcs009_mcs009supp_video2.pdf [file supp_mcs009_mcs009supp_video2.pdf]

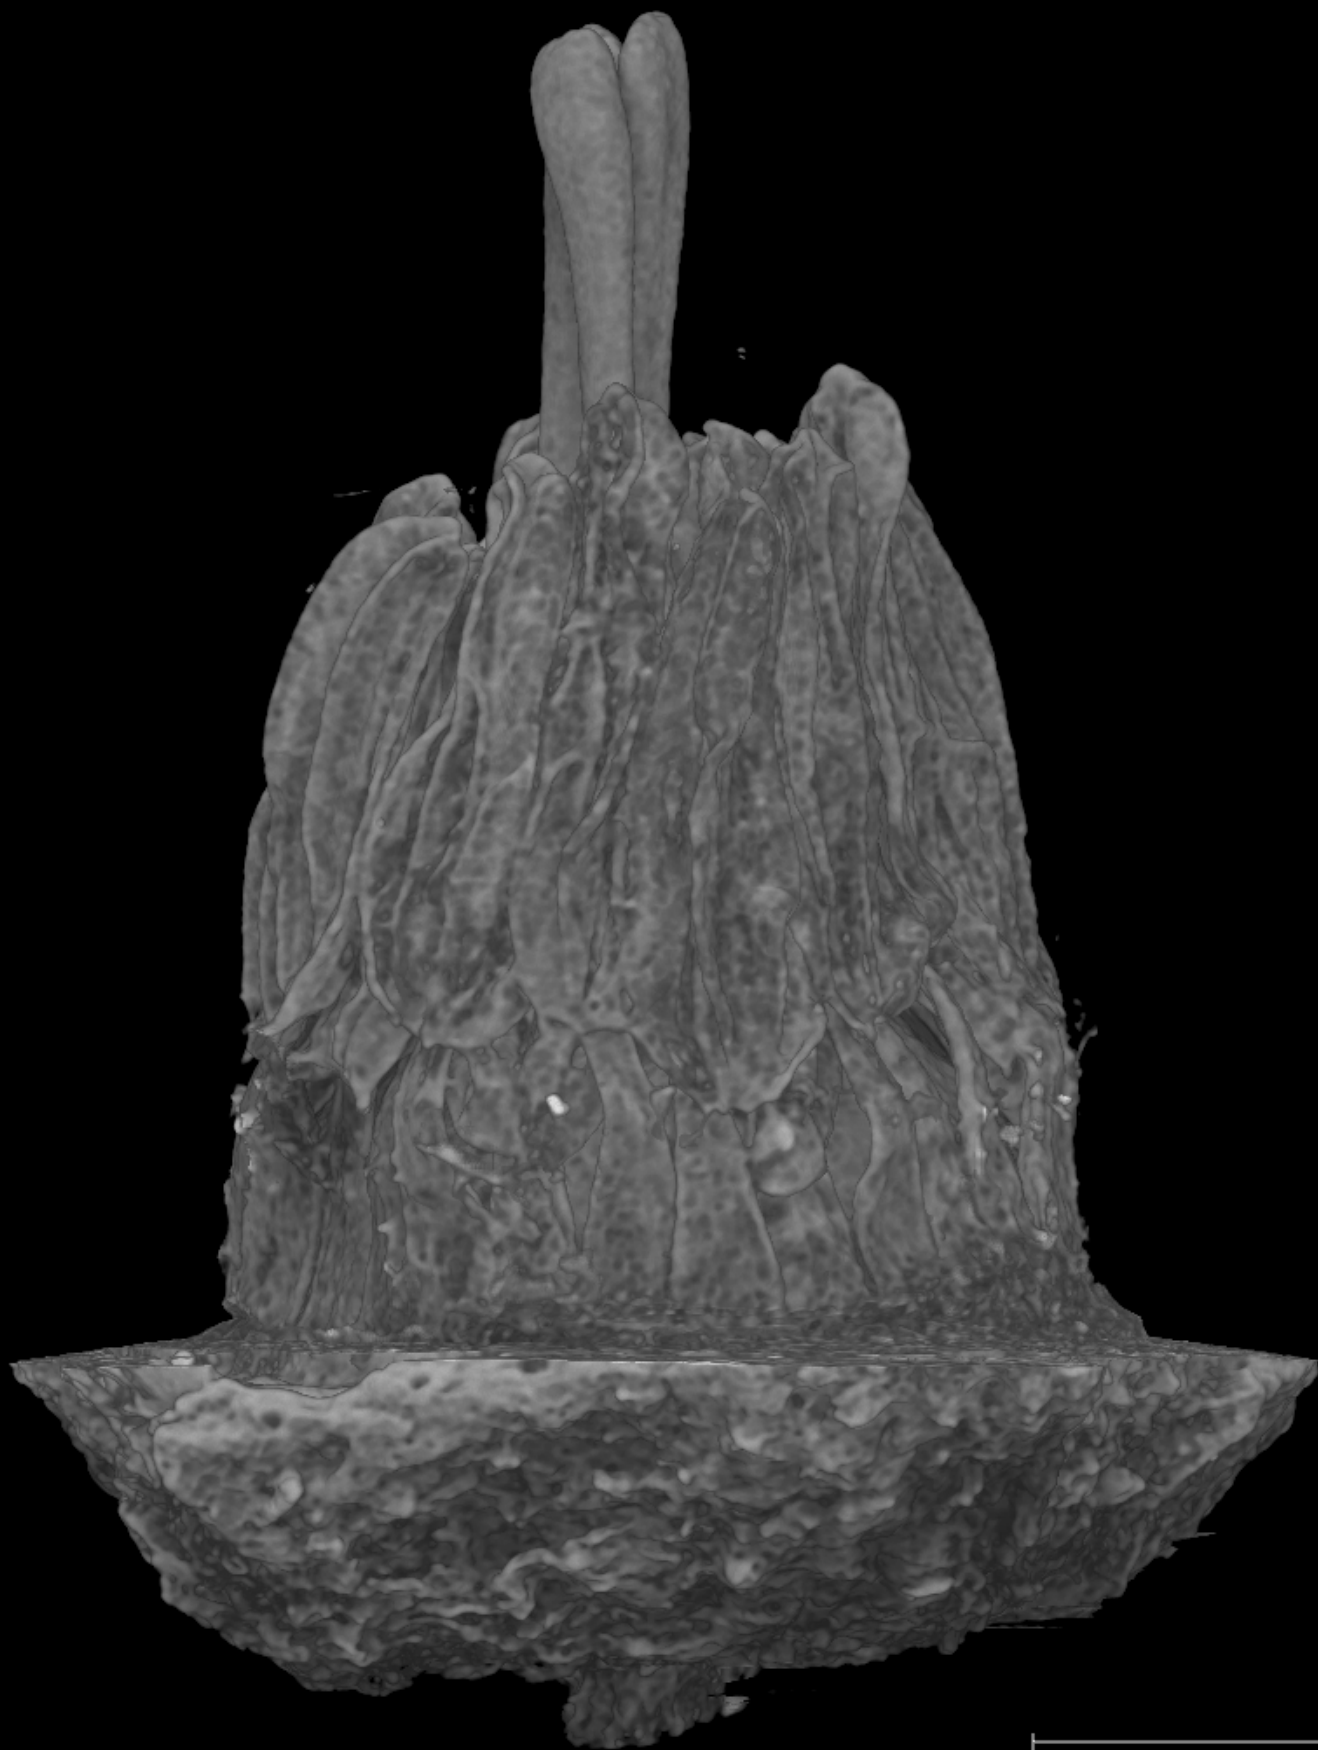

500um

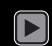

Supplement: supp_mcs009_mcs009supp_video3.pdf [file supp_mcs009_mcs009supp_video3.pdf]

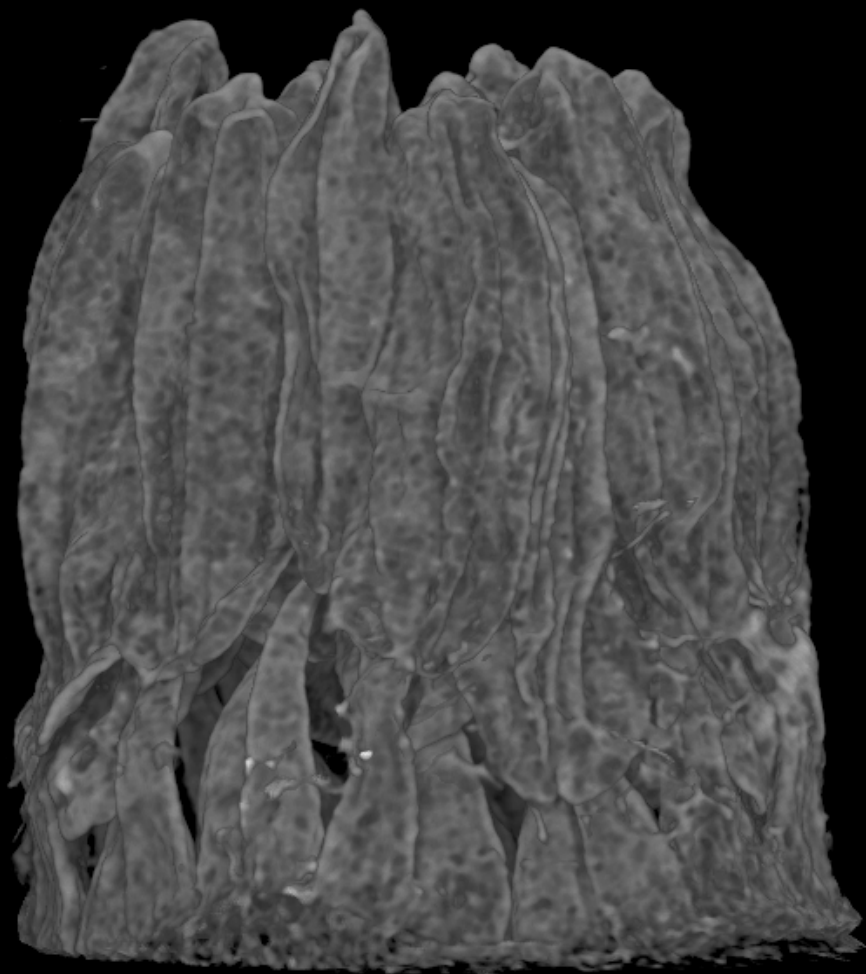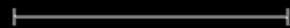

400um

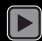

Supplement: supp_mcs009_mcs009supp_video4.pdf [file supp_mcs009_mcs009supp_video4.pdf]

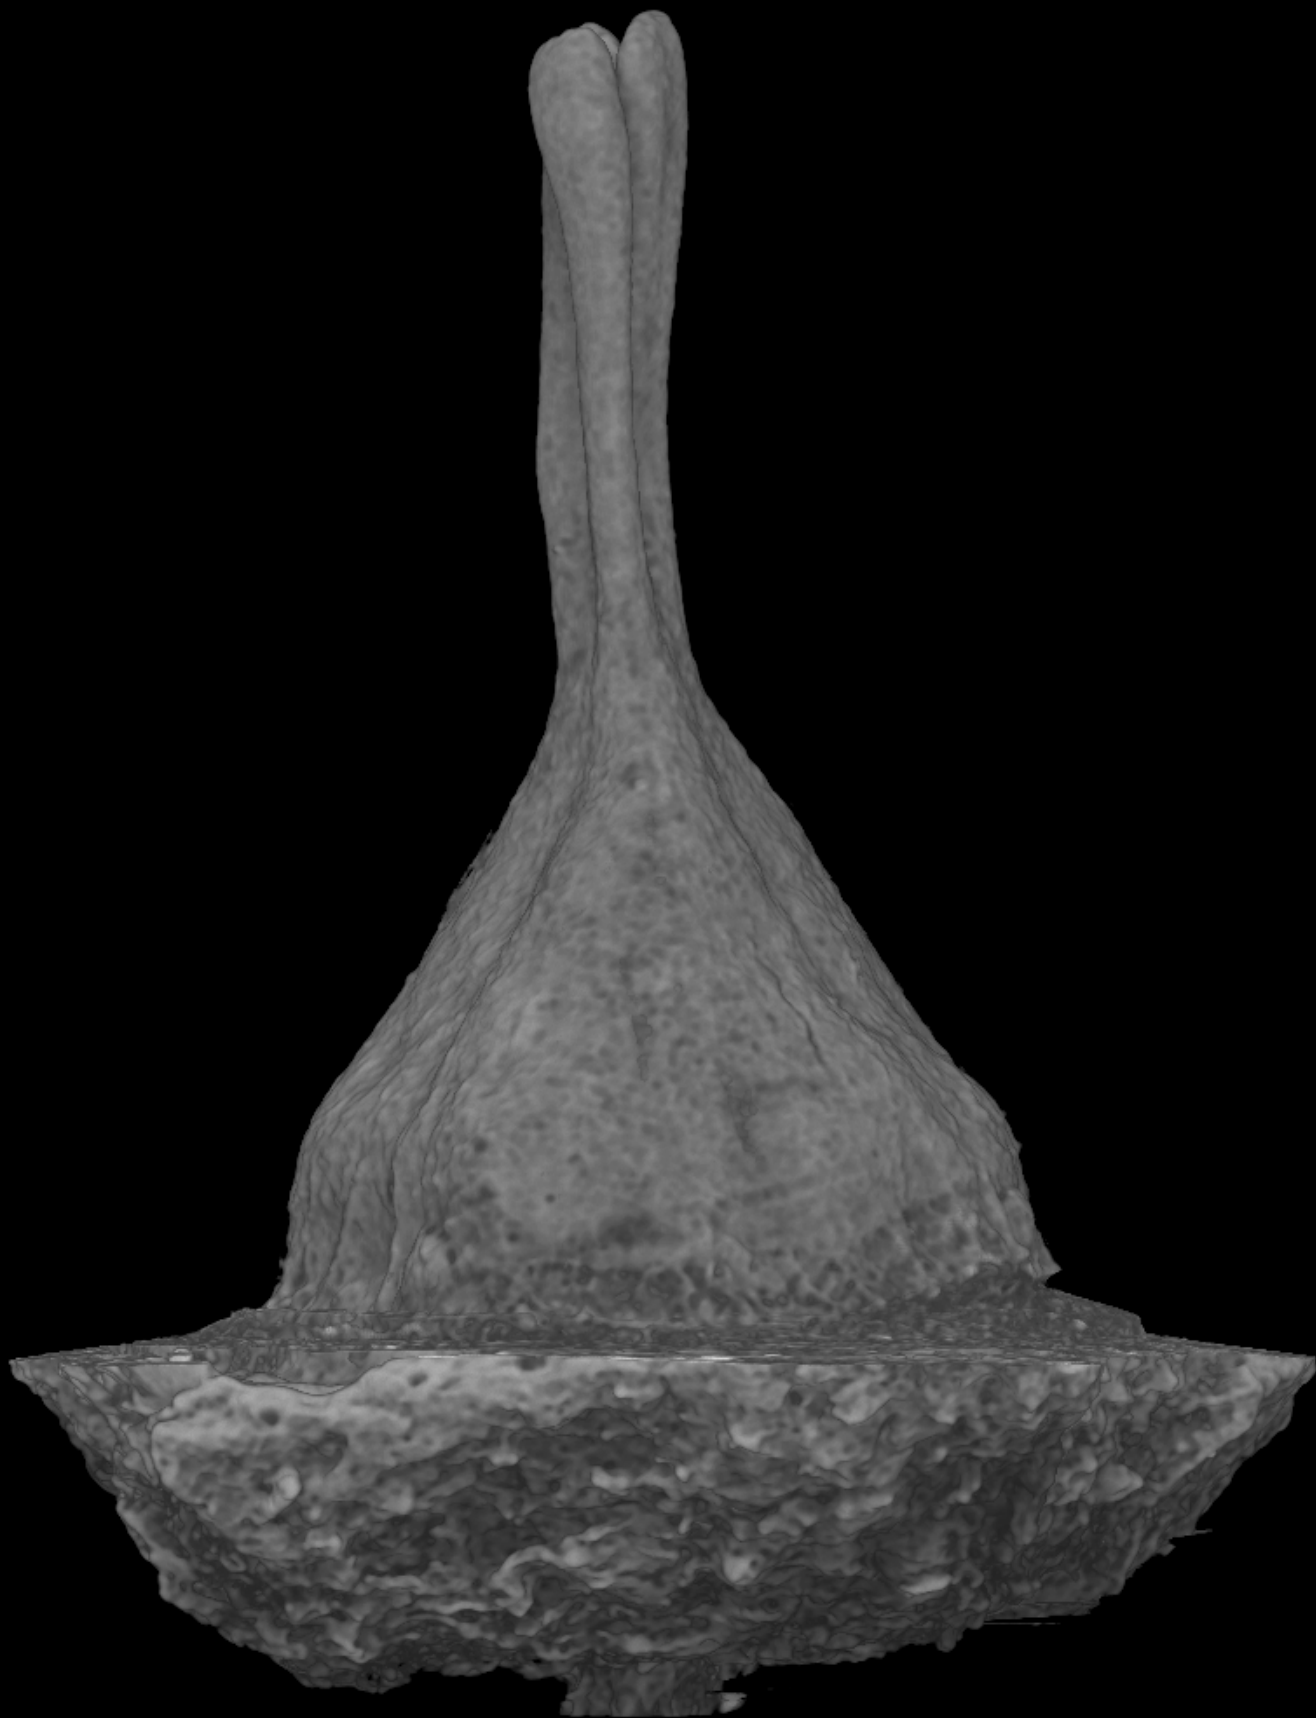

500um

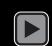

Supplement: supp_mcs009_mcs009supp_video5.pdf [file supp_mcs009_mcs009supp_video5.pdf]
